# Supplementary material
Source: PubMed Central journal article supplement (PMC2822482)

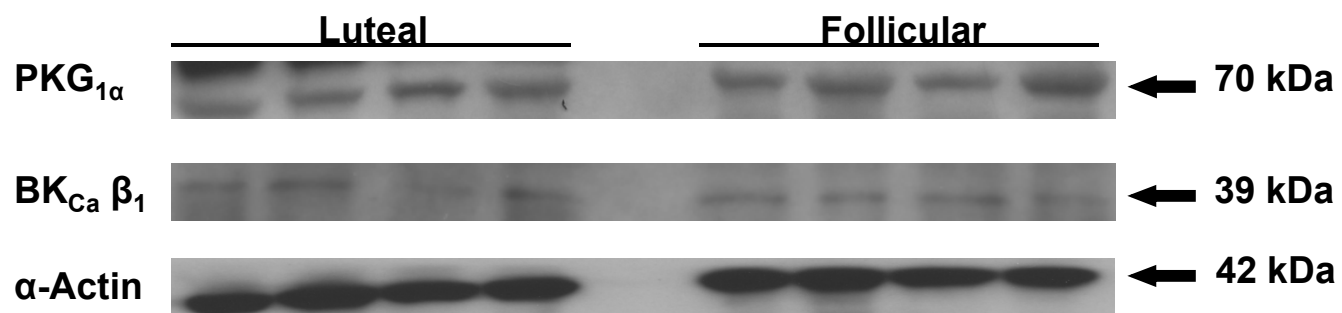

Supplement: suppdata.pdf [file suppdata.pdf]
